# Supplementary material for: Normal Ovarian Function in Subfertile Mouse with Amhr2-Cre-Driven Ablation of Insr and Igf1r
Source: MDPI journal article supplement (doi:10.3390/genes15050616), 2024-05-12
Supplement: s1 [file s1]

A

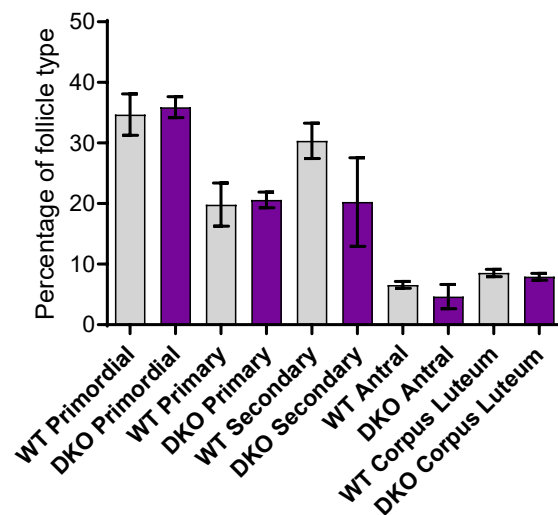

B

Control

DKO

HSD17B7

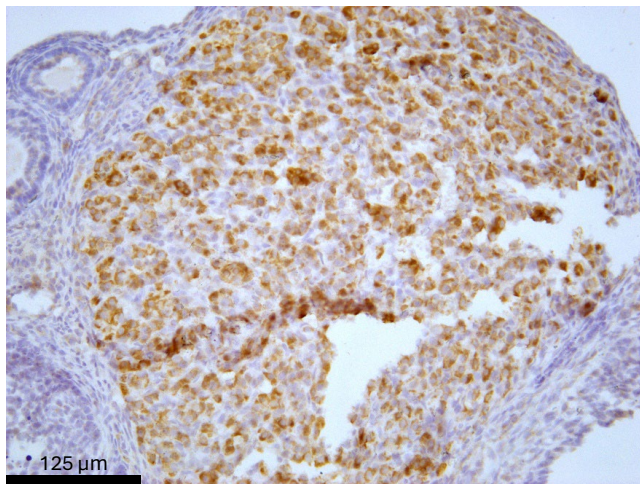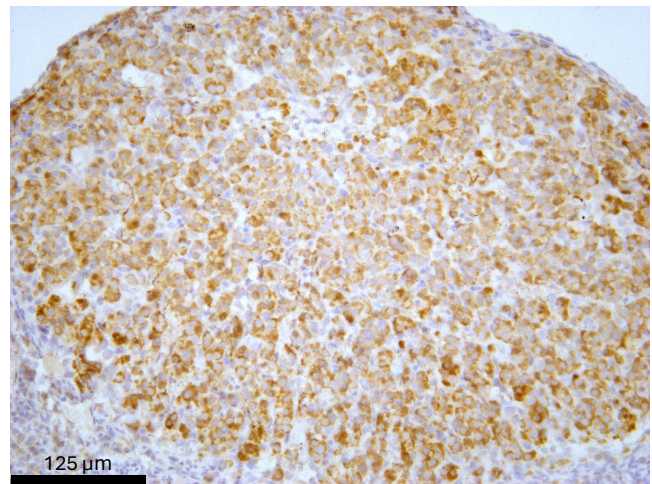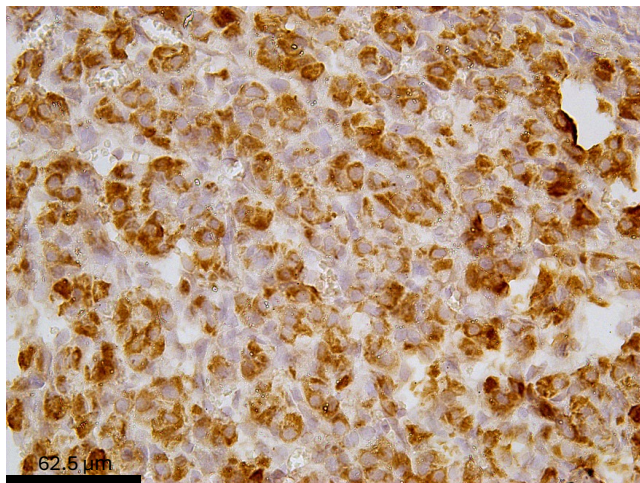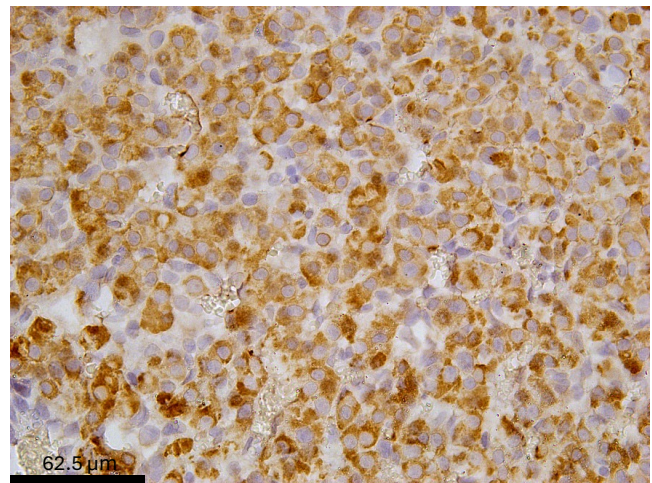

**Supplemental Figure S1.** Histological analysis of folliculogenesis and luteinization in *Amhr2-Cre Insr* and *Igf1r* DKO mice. (A) Ovaries were serially sectioned and total follicle numbers counted. Data are expressed as mean  $\pm$  SEM percentage of each follicle type in the total follicle pool. (B) Immunohistochemistry localization of the luteal cell marker HSD17B7. No oocyte retention in WT or DKO mice was observed in *Amhr2-Cre* propagated mutants as was prevalent in *Pgr-Cre* mediated deletions of both *Insr* and *Igf1r*.

**Table S1. PCR Primers used for analysis of *Amhr2*-Cre insulin receptor knockout mice**

**Genotyping Primers**

| Gene               |           | Sequence 5'-3'                  | Length (bp)  | TM |
|--------------------|-----------|---------------------------------|--------------|----|
| <i>Insr</i> -flox  | For       | GAT GTG CAC CCC ATG TCT G       | 279 (WT)     | 62 |
|                    | Rev       | CTG AAT AGC TGA GAC CAC AG      | 313 (mutant) |    |
| <i>Igf1r</i> -flox | For       | CTT CCC AGC TTG CTA CTC TAG G   | 124 (WT)     | 62 |
|                    | Rev       | CAG GCT TGC AAT GAG ACA TGG G   | 220 (mutant) |    |
| <i>Amhr2</i> -Cre  | Amhr2-For | AGG TGG GTC AGA CCC AGA GCC     | 223 (WT)     | 66 |
|                    | Amhr2-Rev | GCA TGA CCT CCT TCC TGG ATT     | 500 (Cre)    |    |
|                    | Cre-For   | CCG CTT CCT CGT GCT TTA CGG TAT |              |    |
|                    | Cre-Rev   | ACC TAG TAG AGA GGC TGC GTT GA  |              |    |

**Primers used for qPCR**

| Accession number | Gene           |            | Sequence of forward and reverse primers 5'-3'    |
|------------------|----------------|------------|--------------------------------------------------|
|                  | <i>Lhcgr</i>   | For<br>Rev | GAGACGCTTTATTCTGCCATCT<br>CAGGGATTGAAAGCATCTGG   |
|                  | <i>Pgr</i>     | For<br>Rev | CTCCGGGACCGAACAGAGT<br>ACAACAACCCCTTTGGTAGCAG    |
|                  | <i>Ptgs2</i>   | For<br>Rev | CTGACCCCCAAGGCTCAAAT<br>ATTTAAGTCCACTCCATGGCCC   |
|                  | <i>Star</i>    | For<br>Rev | GAAAGCCAGCAGGAGAACG<br>GCGGTCCACAAGTTCTTCAT      |
|                  | <i>Cyp11a1</i> | For<br>Rev | TGTGATTTTCAATAAAGCTGATGA<br>TTCTTGAAGGGCAGCTTGTT |
|                  | <i>Cyp17a1</i> | For<br>Rev | TTTATGCCTGAGCGCTTCTT<br>GCAGCAAGGCCATGAAGATA     |
|                  | <i>Cyp19a1</i> | For<br>Rev | CTGTTGTGGGTGACAGAGACA<br>GCCGTCAATTACGTCATCCT    |
|                  | <i>Hsd3b1</i>  | For<br>Rev | AACAATTTAACAGCCCTCCTAAG<br>GCACCAACATCTTGATGATCC |
|                  | <i>Hsd17b1</i> | For<br>Rev | AGGTGACGGAGCTCTTCTTG<br>CGACATAGCTGCTGCCACT      |
|                  | <i>Hsd17b7</i> | For<br>Rev | GGGCCAAAAGATGGACATAG<br>AGGAACGCCTACATCAGCTC     |
|                  | <i>Rpl19</i>   | For<br>Rev | TGCCTCTAGTGTCCTCCGC<br>ATCCGAGCATTGGCAGTACC      |
